1 To group or not to group: group size dynamics and intestinal parasites in Indian peafowl  
2 populations

3 Priyanka Dange<sup>1</sup>, Pranav Mhaisalkar<sup>1</sup>, Dhanashree Paranjpe<sup>1\*</sup>

4 <sup>1</sup>Annasaheb Kulkarni Dept. of Biodiversity, Abasaheb Garware College, Pune-411004. India.

5 \*Corresponding author

6 Dhanashree Paranjpe

7 E-mail: [dhana4shree@gmail.com](mailto:dhana4shree@gmail.com)

8 ORCID ID\*: <https://orcid.org/0000-0003-4787-2052>

9 Priyanka Dange: ORCID ID: <http://orcid.org/0000-0002-2799-2156>

10 Pranav Mhaisalkar: ORCID ID: <http://orcid.org/0000-0003-1077-1856>

## 11 **Acknowledgements**

12 Thanks to Maharashtra Education Society's Abasaheb Garware College, Pune for hosting the  
13 Ramalingaswami Re-entry Fellowship to DAP and providing the infrastructure and  
14 administrative support. We are thankful to Late Mr. Biswaroop Raha for suggesting field  
15 sites in Nashik, Dr. Dharmendra Khandal and volunteers of Tiger Watch who extended  
16 support for field work in Rajasthan. Authors also appreciate the support and hospitality of  
17 Morachi Chincholi residents during field work. We are also thankful to Rupesh Gawade,  
18 Prasad Gond, Nishant Zazam, Vishal Varma, Apeksha Dharshetkar, Priyanka Bansode,  
19 Eshan Pahade, Ankita Divekar and Akash Dubey and Vedanti Mahimkar for helping with

20 data collection on field. We want to thank the anonymous reviewers for their valuable  
21 suggestions which increased the quality of this manuscript.

22

23

24

25

26

27

28

29

30

31

32

33

34

35

36

37

38

39

40 **Abstract**

41 Animals can form groups for various reasons including safety from predators, access to  
42 potential mates and benefits of allo-parental care. However, there are costs associated with  
43 living in a group such as competition for food and/or mates with other members of the group,  
44 higher chances of disease transmission, etc. Group size dynamics can change with the biotic  
45 and abiotic environment around individuals. In the current study, we explored the links  
46 between group size dynamics and intestinal parasites of Indian peafowl (*Pavo cristatus*) in  
47 the context of seasons and food provisioning. Data for group size was collected across three  
48 seasons (Pre-Monsoon, Monsoon and Post-Monsoon) at three field sites (Morachi Chincholi,  
49 Nashik and Rajasthan). Individual and group sightings of peafowl were noted down along  
50 with group size and composition (no. of males, females, adults, juveniles, sub-adults). Faecal  
51 samples were collected from food provision and non-provision areas across the same three  
52 seasons at same field sites. Parasite load in the samples was quantified using microscopic  
53 examination. Group size was significantly higher in Pre-Monsoon season as compared to  
54 Monsoon and Post-Monsoon seasons. Monsoon and Post-Monsoon seasons had higher  
55 intestinal parasite prevalence and load as compared to Pre-Monsoon season. Thus, group size  
56 and intestinal parasites of Indian peafowl have an inverse relationship across seasons.  
57 Parasite load was significantly greater at food provision sites as compared to non-provision  
58 sites while parasite prevalence was comparable. Aggregation of individuals at the food  
59 provision sites may influence the parasite transmission and group-size dynamics in Indian  
60 peafowl. In conclusion, Indian peafowl are behaviourally plastic and fission-fusion of social  
61 groups may allow them to tackle ecological pressures such as predation and parasite  
62 transmission in different seasons.

63 **Key words:** Fission-fusion, Food-provisioning, Grouping behaviours, *Pavo cristatus*,  
64 Parasite load.

65 **Declarations**

66 **Funding-**This study was funded through Ramalingaswami Re-entry Fellowship to DAP by  
67 Department of Biotechnology, Government of India.

68 **Conflict of interest-** Authors declare no conflict of interest.

69 **Ethics approval-** No live animals/ samples were handled during this study. The study was  
70 conducted outside protected areas. Therefore, the work did not require special permissions or  
71 approval.

72 **Consent to participate-Not applicable**

73 **Consent for publication- Not applicable**

74 **Availability of data and material-** The data is made available as electronic supplementary  
75 material with this manuscript.

76 **Authors contributions-** DAP conceived the study, designed methodology, collected data and  
77 helped in manuscript preparation. PD designed the methodology, collected data, analysed the  
78 data and prepared the manuscript. PM collected and analysed the data.

79

80

81

82

83

84

## 85 **Introduction**

86 Animals can form groups for various reasons that include safety from predators (Powell  
87 1974; Pulliam 1973; Silk 2007), finding food (Clark and Mangel 1986; Silk 2007), breeding  
88 (Silk 2007), and benefits of allo-parental care (Wittemeyer et al. 2005). However, there are  
89 also costs associated with living in a group such as competition for food (Krause and Ruxton,  
90 2002) and/or mates (Silk 2007) with other members of the group, higher chances of disease  
91 transmission (Hochberg 1991), more negative interactions such as harassment (Clutton-Brock  
92 and Parker 1995), aggression (Krause and Ruxton 2002), and becoming more conspicuous to  
93 predators (Cresswell 1994; Krause and Ruxton 2002). Social groups form when the benefits  
94 of being in a group outweigh the costs (Sutton 2019). These costs and benefits can also be  
95 dynamic depending on environmental factors such as resource availability (Sutton 2019;  
96 Wittemeyer et al. 2005) and predation risk (Cresswell 1994; Krause and Ruxton, 2002).  
97 Ultimately these cost and benefits may influence the decision to be part of the group or not.

98 In many group-living species, groups can split (fission) or merge (fusion) as they move  
99 through the environment (Couzin 2006). Fission-fusion societies are thought to be good at  
100 adjusting to rapid changes in local environment and balancing the cost-benefits of grouping  
101 by changing the group sizes (Aureli et al. 2008). Fission-fusion societies have been mostly  
102 reported in long-lived and cognitively complex organisms such as dolphins (Smith et al.  
103 2016), giraffe (Sutton 2019), chimpanzees (Lehmann and Boesch 2004), orangutans (van  
104 Schaik 1999) and elephants (Fishlock et al. 2013; Nandini et al. 2017). These types of  
105 grouping structures have also been reported in bats (Popa-Lisseanu 2008; Kashima et al.  
106 2013), guppies (Croft et al. 2004) and avian systems (Silk et al. 2014). In shorebirds and  
107 wildfowl, lower amount of food resources and changes in predation risk during tidal cycles  
108 influenced their grouping decisions and consequently, fission-fusion dynamics (Fleischer  
109 1983; Inger et al. 2006; Beauchamp 2010).

110 Fission-fusion dynamics are also known to influence endo-parasite transmission and  
111 susceptibility in brown-spider monkeys and gorillas (Caillaud et al. 2006; Rimbach et al.  
112 2015). Flocking behaviour affected *Plasmodium* and *Haemoproteus* infections in Afro-  
113 tropical birds (Lutz et al. 2015). Parasite infections were also reported to change with respect  
114 to season in backyard poultry (Bhatt et al. 2014) and communal goats of Zimbabwe (Pandey  
115 et al. 1994).

116 Indian peafowl (*Pavo cristatus*) is a species that has co-habited human dominated landscapes  
117 for centuries in its native geographical range. This avian species is native to the Indian  
118 subcontinent and has been introduced in many parts of the world relatively recently.  
119 Although the species' native habitat is undergrowth in open forest and woodlands near a  
120 waterbody, it is also known to occur near farmlands, villages and increasingly becoming  
121 common in urban and semi-urban areas (Burton and Burton 2002). Indian peafowls spend  
122 much of their active time on the ground. Social organization of feral Indian peafowl has been  
123 studied in context of mating behaviour (Rand et al. 1984), but it is not known if their  
124 grouping behaviour changes across space and time.

125 Previous study by Paranjpe and Dange (2020) showed that food provisioning changes feeding  
126 behaviours of Indian peafowl. Provisioning is known to affect parasite infections in racoons  
127 (Gompper and Wright 2005) and elk populations (Cross et al. 2007). Supplementary food  
128 available at bird feeders is known to have far reaching consequences on avian ecology in  
129 terms of increasing survival during overwintering, enhanced breeding success, changing sex-  
130 ratios of offspring in smaller avian species and range expansion of species (Robb et al. 2008).  
131 It is not known if provisioning can affect grouping behaviour and parasite infections in Indian  
132 peafowl populations. Therefore in this study, we tried to explore the links between the  
133 intestinal parasite infections and group dynamics in Indian peafowl populations in context of  
134 seasonal gradients and food provisioning (Fig 1).

135 **Materials and methods**

136 *Study sites:*

137 This study was conducted at the following field sites: Morachi Chincholi, Nashik and  
138 Rajasthan (villages on the periphery of Ranthambhore Tiger Reserve) from 2016 to 2019  
139 (Table 1).

140 Selection of study areas was based on several criteria such as their proximity to human  
141 habitation, accessibility to the field sites throughout the year and history of peafowl  
142 populations in the area. Areas located outside protected areas and close to human habitation  
143 were given preference since food provisioning is likely to happen in these areas and studying  
144 the effects of food provisioning on grouping and parasite infections was one of the objectives  
145 of the study.

146 According to our estimate, ~30-35 Kg food grains are offered to peafowl per day in the  
147 village and surrounding areas of Morachi Chincholi, while ~15Kg grains are offered per day  
148 around homes and temple premises in the villages in Rajasthan included in this study. In both  
149 these study areas, grains are offered at designated places everyday throughout the year. Thus,  
150 Indian peafowl population in Morachi Chincholi had access to diet rich in carbohydrates  
151 (cereals) and proteins (pulses) throughout the year (Paranjpe and Dange, 2020). As much as  
152 71% of their diet consisted of food provisioned indirectly in the form of crops or directly as  
153 grains offered in the village surroundings. Villages on the periphery of Ranthambhore Tiger  
154 Reserve (RTR), in Rajasthan offer relatively less variety of cereals and very few pulses, yet  
155 the diet of peafowl in Rajasthan has up to 61% of food provisioned by humans versus 39%  
156 natural food. The peafowl population at the third field site in Nashik, on the other hand, has  
157 access to less reliable and less varied food offered by humans (~ 3-5 Kg per day). As a result  
158 only about 40% of their diet consists of provisioned food (Paranjpe and Dange, 2020).

159

160

**Table 1. Brief description of field sites**

| <b>Field sites</b>                                     | <b>GPS co-ordinates and elevation</b>               | <b>Provisioning of food grains (in kg) per day</b> |
|--------------------------------------------------------|-----------------------------------------------------|----------------------------------------------------|
| Morachi Chincholi                                      | 18° 48' 26.9" N, 74° 09' 29.3" E,<br>elevation 641m | ~30-35                                             |
| Villages in the vicinity of Ranthambhore Tiger Reserve |                                                     |                                                    |
| 1) Govindpura                                          | 26° 04.826" N, 76° 48.097" E,<br>elevation 227m     | ~15                                                |
| 2) Bangarda Kalan                                      | 26°03'57.78"N, 76°42'35.76"E,<br>elevation 225m     |                                                    |
| 3) Kuttalpura                                          | 26° 03' 58.5" N, 76° 26' 13.4" E,<br>elevation 261m |                                                    |
| 4) Shyampura                                           | 26 01' 31.6" N, 76 23' 20.5" E<br>elevation 265m    |                                                    |
| 5) Sanwata-Kalakhora                                   | 26°06'41.46"N, 76°38'33.81"E,<br>elevation 267m     |                                                    |
| Nashik                                                 | 20° 01'11.0"N, 73° 48'04.0"E,<br>elevation 404m     | ~ 3-5                                              |

161

162 *Group size*

163 Populations of Indian peafowl were studied throughout the year using direct field  
 164 observations during morning (6 am to 10 am) and evening (4 pm to 7 pm) at selected field  
 165 sites. Individual and group sightings of peafowl were noted down along with date, time of  
 166 day, habitat, group size and composition (no. of males, females, adults, juveniles, sub-adults).



167 Seasons were noted as Monsoon, Pre-Monsoon and Post-Monsoon. Arrival of Monsoon rains  
168 marks a remarkable transition of seasons on Indian subcontinent. Monsoon season is  
169 associated with greater availability of water, food and sowing of kharif crops. Monsoon  
170 season for Morachi Chincholi and Nashik is June to September while for Rajasthan it is July-  
171 September as Monsoon rains start in Rajasthan later than the other two sites. Post Monsoon  
172 season is October- January, while Pre-Monsoon season is February to May for Morachi  
173 Chincholi and Nashik, February to June for Rajasthan.

#### 174 *Detection of intestinal parasites from faecal samples*

175 Faecal samples of Indian peafowl were collected using clean forceps from food provision and  
176 non-provision areas across the three seasons (Pre-Monsoon, Monsoon and Post-Monsoon)  
177 from the field sites. Samples collected at the food provision sites were within 2m radius of  
178 the identified area where food is offered to the peafowl throughout the year. The appearance  
179 and consistency of the sample was noted down along with the GPS co-ordinates of the  
180 location where it was collected. The sample was divided roughly in two equal parts - one part  
181 in pre-weighted sample bottle containing 5ml saline and another part in pre-weighted empty  
182 bottle. The bottles were weighed again to estimate the weight of faecal sample. Faecal  
183 samples of peafowl were subjected to two methods of analysis for estimating parasitic load  
184 and diversity.

185 Method 1: Samples collected in physiological saline (0.83 %-0.9 %) were further processed  
186 with 2 % Potassium dichromate ( $K_2Cr_2O_7$ ) to enhance sporulation of cyst forming parasites.  
187 Then parasites were isolated using Sheather's Sugar Flotation method (Duszynski and Wilber  
188 1997).

189 Method 2: Sample was fixed using 10% formalin and no sporulation agent was used. Further  
190 the sample was washed with tap water, centrifuged at 2000 rpm for 5 minutes and re-

191 suspended in 2.79M Zinc Sulfate hepta-hydrate ( $ZnSO_4$ ). The sample was again centrifuged  
192 at 2000 rpm for 5minutes (Watve and Sukumar 1992).

193 Samples processed in  $K_2Cr_2O_7$  enhance the sporulation of cyst forming parasites while the  
194 samples fixed in formalin might show both cyst and non-cyst forming parasites. 75-80 micro-  
195 litre of processed sample thus obtained were subjected to microscopy for quantification of  
196 parasite load and photo-documentation of parasite types using Magvision software. In the  
197 beginning, the parasites were screened in the microscopic fields ranging from 11 to 20, to see  
198 if number of fields affects the counts of parasites. As there was no correlation between  
199 number of microscopic fields sampled and parasite load (Pearson's correlation,  $r=0.08$ ,  
200  $p=0.19$ ), 20 microscopic fields were screened for each sample thereafter. Parasite load was  
201 quantified by sampling 20 fields under the microscope for each method respectively.  
202 Parasites were identified at the broader levels- group, family, class and phylum- wherever  
203 possible using references of identified parasites in literature (Snore 1939; Atkinson et al.  
204 2008; Schoener et al. 2012; Jaiswal et al. 2013). Photos with uncertain identity were not  
205 included in the analysis.

206

### 207 *Statistical Analysis*

208 All data were analysed using statistical software STATISTICA™ version 13.2 (Dell Inc.  
209 2016). Group sizes were compared across habitats, field sites (Morachi Chincholi, Nashik,  
210 Rajasthan), time of day (morning, evening), and seasons (Pre-Monsoon, Monsoon and Post-  
211 Monsoon) using non-parametric tests as the group size data did not follow normal  
212 distribution. Parasite prevalence was calculated as (presence or absence of parasites/total no.  
213 of samples screened\*100) and was not different across methods ( $K_2Cr_2O_7=74%$  and  
214  $ZnSO_4=75%$ ,  $N=185$ ). Hence, for calculating parasite prevalence, presence/ absence data of  
215 parasites detected using both methods were pooled and prevalence was compared across field

216 sites (Morachi Chincholi, Nashik and Rajasthan), season (Pre-Monsoon, Monsoon and Post-  
217 Monsoon) and provisioning status (presence/absence of feeding site). Parasite load was  
218 calculated as count of parasites in 20 microscopic fields for both the methods respectively. As  
219 parasite load was not different across methods (Wilcoxon Matched Pair tests,  $p=0.74$ ,  
220  $N=185$ ), it was also pooled for both the methods and calculated by using the following  
221 formula:

$$\begin{aligned} 222 \text{ Parasite load} &= \frac{\text{Total counts of parasites (K}_2\text{Cr}_2\text{O}_7+ \text{ZnSO}_4\text{)}/\text{Total fields scanned (both}} \\ 223 &\text{ methods)}}{\text{Counts/microscopic field}} \end{aligned}$$

225 Further, the parasite load was compared across field sites, season and provisioning. Based on  
226 the presence/ absence data obtained from the photo-documentation, parasite types were  
227 identified till family level or phylum level and categorized into following groups:  
228 Eimeridae, Nematode, Cestode, Trematode and Helminth. Parasite types identified in the  
229 study can be viewed in Fig 2 and a brief summary about identification characteristics and  
230 mode of transmission is given in the Table 2.

231

232

233

234

235

236

237

238

239

240

241 **Table 2. Brief summary of identification characteristics of Parasite types**

| <b>Parasite type</b> | <b>Identification characteristics</b>                                                                                                                                                                                                                                                           | <b>Life cycle and Mode of transmission</b>                                                                                                                                                                                                            |
|----------------------|-------------------------------------------------------------------------------------------------------------------------------------------------------------------------------------------------------------------------------------------------------------------------------------------------|-------------------------------------------------------------------------------------------------------------------------------------------------------------------------------------------------------------------------------------------------------|
| 1) Eimerideae        | Typically an oocyst consisting non-sporulated or sporulated sporocysts depending on the stage of development (Atkinson et al. 2008). Size ranges around 1µm in breadth to 2µm in length when observed under the microscope with the magnification of 400X.                                      | Oocysts shed in the faeces of infected host are taken up through food and water by non-infected individuals. The oocyst contains the infective sporozoites and these are released when the oocyst reaches the small intestine (Atkinson et al. 2008). |
| 2) Nematode          | Nematode eggs in fresh faeces consist of a shell lined a semi-permeable membrane. This shell membrane may enclose one or more cells or fully grown embryo. (Snore 1939). Size ranges around 3µm in breadth and 6µm in length when observed under the microscope with the magnification of 400X. | Nematodes infect their hosts either through egg ingestion or through intermediate co-host. (Leung and Koprivnikar 2016).                                                                                                                              |
| 3) Cestode           | Cestode eggs consist of two membranes. Outer membrane is rough while inner membrane is smooth and harbours a developing embryo. (Schoener et al. 2012) Size ranges around 6µm in breadth and 7µm in length when observed under the microscope with the magnification of 400X.                   | Cestodes follow multiple host life cycles. (Gunn and Pitt 2012).                                                                                                                                                                                      |
| 4) Trematode         | The eggs are ellipsoidal in shape with a single layered membrane. Size ranges around 3µm in breadth to 5µm in length when observed under the microscope with magnification of 400X.                                                                                                             | Trematodes follow a complex life cycle that includes one or two intermediate hosts, first of which is invariably a mollusc which can be ingested by other host (Gunn and Pitt 2012).                                                                  |
| 5) Helminth          | Eggs that could not be identified on the finer levels like Nematode, Cestode or Trematode were labelled as Helminth                                                                                                                                                                             | Helminths follow multiple host life cycle and include one or two intermediate hosts.                                                                                                                                                                  |

|  |                                                                                                                             |                       |
|--|-----------------------------------------------------------------------------------------------------------------------------|-----------------------|
|  | egg. Size ranges around 2µm in breadth and 3µm in length when observed under the microscope with the magnification of 400X. | (Gunn and Pitt 2012). |
|--|-----------------------------------------------------------------------------------------------------------------------------|-----------------------|

242 **Results**

243 *Group size*

244 Group size of Indian peafowl ranged from 1-14 individuals, (665 groups observed). 170 out  
245 of 665 groups observed (26%) comprised of 3 or more individuals. Ninety-nine groups  
246 contained just two individuals (15%) while 396 single individuals (59%) were observed  
247 during the study period. 57 out of 99 pairs observed (58%) had adult males as part of the pair.  
248 Out of 396 single individuals, 314 individuals were adult males (80 %), 54 females (14 %),  
249 26 sub-adult males (6.5%) and two juveniles (0.5 %). Thus, adult males are mostly seen to  
250 live on their own or in pairs while, females, sub adult males and juveniles mostly live in  
251 groups of two or more individuals.

252 Group size was found to be similar across our field sites (Median test, Chi Square=1.99, df  
253 =2, p=0.36). Time of day (morning or evening) did not influence the size of group (Mann-  
254 Whitney U test, p=0.08), which indicates that the groups might not be momentary  
255 assemblages of individuals for the purpose of feeding or movement but relatively long-term  
256 associations of at least a few days/ months. The distribution of group size data across the  
257 seasons was positively skewed (Fig 3). The group size changed significantly with season  
258 (Median test, Chi square=11.44, df =2, p=0.0024). Multiple pair-wise comparisons showed  
259 that Pre-Monsoon (N=314) groups were significantly greater in size compared to groups  
260 during Monsoon season (N=238) ( $p = 0.0024$ ), while group sizes in Post-Monsoon season  
261 (N=68) were comparable with Pre-Monsoon and Monsoon seasons ( $p=0.77$ ).

262

263 *Intestinal Parasites*

264 Parasite prevalence and load (counts/microscopic field) of Indian peafowl changed according  
265 to the season. Parasite load (counts/microscopic field) ranged from 0 to 25.54 with  
266 Median=0.63 (244 samples screened). The distribution of data across the seasons (Fig 4) and  
267 provisioning (Fig 5) was positively skewed. Parasite prevalence was the least (64%) in all  
268 study populations in the Pre-Monsoon season (N=97), which increased to 91 % prevalence in  
269 Monsoon season (N=81) and 92 % in Post-Monsoon season (N=66). Similar seasonal trend  
270 was seen for parasite load, where parasite load was significantly lower in Pre-Monsoon  
271 (N=97) season compared to Monsoon (N=81) season (Median test, Chi Square=16.54, df =2,  
272  $p=0.0003$ ). Multiple comparison followed by Median test showed comparable parasite load  
273 between Post-Monsoon (N=66) and Monsoon (N=81) ( $p=1.0$ ). Parasite prevalence in samples  
274 collected at food provision sites (85%, N=113) was comparable with samples collected at  
275 non-provisioned sites (78%, N=131). However, parasite load was significantly higher in  
276 faecal samples collected near the food provision sites (N=113) compared to non-provision  
277 sites (N=131) (Mann-Whitney U test,  $p = 0.004$ ). Parasite prevalence and load was not  
278 different at field sites-Morachi Chincholi (N=116), Rajasthan (N=65) and Nashik (N=63)  
279 (Median test, Chi Square=2.556, df =2,  $p=0.2786$ ).

280 The parasite types identified were grouped as Eimeridae, Nematodes, Cestodes, Trematodes  
281 and Helminths. Based on the presence / absence data collected from the samples, the percent  
282 prevalence of each parasite type was calculated as (number of positive samples for a parasite  
283 type)/ (Total no. of samples)\*100. The  $K_2Cr_2O_7$  method was qualitatively better for detecting  
284 and identifying parasites belonging to family Eimeridae based on the structure of cysts  
285 compared to  $ZnSO_4$  method. Nematodes were detected with higher percentage in samples  
286 processed using  $ZnSO_4$  (20%) compared to  $K_2Cr_2O_7$  (8%).

287 Pre-Monsoon and Post-Monsoon seasons had lower percentage prevalence (62% and 65%  
288 respectively) for Eimerideae as compared to Monsoon (84%). (Fig 6). Cestodes were also in  
289 higher percentage in Post-Monsoon (47%) season in comparison to Monsoon (32%) and Pre-  
290 Monsoon season (20%) (Fig 6). Nematodes showed higher percentage prevalence during  
291 Post-Monsoon (35%) season as compared to Monsoon (22%) and Pre-Monsoon (20%)  
292 season (Fig 6). Cestodes were found in higher percentages at non-provision (40%) sites as  
293 compared to provision (20%) sites (Fig 7). Across the field sites, Eimerideae were detected in  
294 higher percentages in Morachi Chincholi (62%) as compared to Rajasthan (42%) and Nashik  
295 (42%) (Fig 7). Cestodes were detected in lower percentages at Rajasthan (7%) as compared  
296 to Morachi Chincholi (35 %) and Nashik (26 %) (Fig 8).

297

## 298 **Discussion**

### 299 *Effect of season on group size and intestinal parasites of Indian peafowl*

300 Peafowls showed larger group size in Pre-Monsoon season as compared to Monsoon and  
301 Post-Monsoon seasons. Pre-Monsoon season consists of dry hot summers at all three field  
302 sites. During the summers as vegetation dries up, peafowls can be easily spotted at large  
303 distances by their predators/intruders. In Morachi Chincholi and Nashik, feral dogs are often  
304 their predators while caracals, feral dogs and tigers are said to be the predators of Indian  
305 peafowl in Rajasthan (anecdotal). Remaining in larger groups in Pre-Monsoon season may,  
306 thus, provide safety to them from predators/ intruders or simply reduce the risk of predation  
307 due to dilution effect (Foster and Treherne 1981; Creswell 1994). In another study in  
308 Redshanks, the probability of attack by raptors was lesser in individuals staying in larger  
309 flocks as compared to individuals staying in smaller flocks (Cresswell 1994). Group size  
310 dynamics was driven by tidal cycles in Light Bellied Geese where their flock size increased

311 with the predation risk (Inger et al. 2006). As reported in previous studies on various other  
312 study systems, there are also costs associated with living in a group such as competition for  
313 food (Krause and Ruxton, 2002) with other members of the group and higher chances of  
314 disease transmission (Hochberg 1991). Larger groups may become more conspicuous to  
315 predators (Cresswell 1994; Krause and Ruxton 2002).

316

317 In spite of these potential costs, the peafowls in our study populations were seen in larger  
318 groups during Pre-Monsoon season at all three field sites. When the Monsoon commences,  
319 the larger peafowl groups start splitting. There might be two possible reasons why peafowl  
320 groups split:

321 1. Newly sown crops/ sprouts, insects, worms become abundant everywhere soon after the  
322 rains start in June. So, food and water availability are not restricted to food provision sites  
323 anymore, in contrast to dry hot summer months of Pre-Monsoon season. There is still good  
324 visibility for about two months till the crops/ grasses/ vegetation grow enough. So being in a  
325 group can still offer protection against predators, however, benefits of getting varied food  
326 which is now available everywhere may override the costs of leaving the group.

327 2. Breeding males break off from larger groups and establish their display territories (if they  
328 haven't already established such territory since April-May). Since they have to defend these  
329 display territories throughout the breeding season (till Sept-October, when Monsoon/ wet  
330 season also ends), breeding males can no longer afford to be part of larger groups. The peak  
331 of breeding season is June-July-August, when we mostly see solitary breeding males and  
332 groups of females + sub-adult males (See supplementary data). So the fission-fusion of  
333 groups is also related to their behavioural changes during breeding season.

334 Interestingly, our parasite data indicated that parasite prevalence and load in our study  
335 populations were in fact lower during Pre-Monsoon season. Thus, peafowl populations seem



336 to be at lower risk of intestinal disease transmission in spite of being in larger groups during  
337 Pre-Monsoon season. All the parasites detected from faecal samples are intestinal parasites.  
338 Most likely their transmission happens via faecal-oral route or through intermediate hosts  
339 (Table 2 and references within). Probability of transmission of intestinal parasites is usually  
340 higher during wet season, i.e., Monsoon. Thus, increased risk of disease transmission in a  
341 larger group combined with need to establish/ defend display territories may result in many  
342 males leaving the groups during Monsoon season. Similar to our results, the prevalence of  
343 endoparasites was highest in the Monsoon season (83%) in backyard poultry in North region  
344 of India (Bhatt et al. 2014). Nematode burden was the least in dry season and highest in the  
345 rainy seasons in communal land goats of Zimbabwe (Pandey et al. 1994).  
346 Seasonal trends are also reflected in the parasite types where Pre-Monsoon season had lower  
347 percentages of Nematode and Cestode as compared to Monsoon and Post-Monsoon season.  
348 Prevalence of Eimeridae was comparable between Post-Monsoon and Pre-Monsoon but  
349 more in Monsoon season. As Eimeridae are chiefly transmitted to next host via faecal oral  
350 route (Atkinson et al., 2008) and wet season (Monsoon) is more conducive for such  
351 transmission, Eimeridae might be more prevalent during Monsoon season compared to Pre-  
352 Monsoon and Post-Monsoon seasons.  
353 If indeed there is lower risk of disease transmission during Pre-Monsoon season, peafowls  
354 could get benefits in terms of lower parasite transmission and reduced risk of predation when  
355 they were seen in larger groups during Pre-Monsoon season. Smaller group sizes in Monsoon  
356 and Post-Monsoon season when parasite prevalence/load is greater, might be a strategy to  
357 control parasite transmission in Indian peafowl populations. Control of parasite transmission  
358 may be important in determining the integrity of social group composition and regulation of  
359 group size (Freeland 1979). This temporal pattern of fission-fusion of groups in Indian

360 peafowl may, thus, be a result of behavioural strategies to tackle ecological stressors such as  
361 predation and parasite transmission.

362 Beyond a simple dependence on group size, however, recent work in the field of network  
363 epidemiology has shown that infectious disease spread largely depends on the organization of  
364 infection-spreading interactions between individuals (Sah et al. 2017). Group composition/  
365 organization in Indian peafowl populations consisted of adult males, who were mostly seen to  
366 live on their own or in pairs while, females, sub adult males and juveniles were seen in  
367 groups of two or more individuals. But we were not able to study the network epidemiology  
368 in those groups, as we did not have the individual identity of members of a group. Therefore,  
369 further studies might be needed to explore how group composition and social interactions  
370 within and across larger groups may influence disease transmission.

#### 371 *Effect of provisioning on intestinal parasites of Indian peafowl*

372 Samples found at food provisioning sites had significantly higher parasite load than non-  
373 provision sites. Percentage prevalence of parasite types- Eimeridae, Nematode, Helminth  
374 and Trematode was comparable at provisioned and non-provisioned sites, except for Cestode  
375 which was higher in percentage at non-provisioned sites (Fig.7.). Higher parasite load at  
376 provisioning sites may be due to aggregation of groups at provisioning sites and the increased  
377 risk of transmission of parasites. Similar trend was observed in racoon populations, where the  
378 resource distribution was altered through experimental manipulation to enhance aggregation  
379 of individuals. This resulted in significant increase of prevalence (up to 54%) of the parasitic  
380 nematode *Baylisascaris procyonis* in the experimental population (Gompper and Wright  
381 2005). Similarly, the brucellosis infection was highly correlated with the duration and  
382 aggregation of individuals at the feeding grounds in elk populations (Cross et al. 2007).  
383 Nutritional quality of provisioned food may also affect the parasite load in the host. For  
384 example, supplemental feeding of rock iguanas by tourists in the Bahamas with carbohydrate-

385 rich foods such as cereals and grapes was associated with altered nutritional status and  
386 increased hookworm burdens (Knapp et al. 2013). On the contrary, in lace monitor,  
387 supplementary feeding in form of accidental urban waste, improved nutrition and lowered  
388 intensity of pathogen *Haemogregarina varanicola* (Jessop et al. 2012).  
389 In this study, individuals were not marked and it is very difficult to identify and keep track of  
390 individuals by sight. Therefore, there is a possibility that faecal samples of some individuals  
391 may have been sampled repeatedly at provision and non-provision sites and across seasons.  
392 However, there was no bias in sampling with respect to healthy or infected individuals as the  
393 data was collected across 3 years and all areas at each field site were sampled consistently  
394 across all seasons. Apart from food provisioning and season, other factors such as stage of  
395 infection within the host, immunity and stress levels of the host may influence the number of  
396 eggs or cysts released into the faecal samples. However, the estimated parasite load can still  
397 give us valuable information about how many individuals in the population are capable of  
398 spreading the infection and the health status of the infected individuals at a given time. This  
399 information will be further useful to address how parasite load and the spread of infection can  
400 influence the group size dynamics.

401

## 402 **Conclusions**

403 In many group-living species, groups may merge or split as they move in their environment.  
404 In this study, Indian peafowl (*Pavo cristatus*) exhibited fission-fusion dynamics in their  
405 group sizes across seasons. These temporal changes in group size were associated with the  
406 dynamics of intestinal parasite prevalence and load in those seasons. Aggregation of groups  
407 of peafowl at food provision sites matched with higher parasite prevalence and load. Most of  
408 the earlier studies on intestinal parasites in Indian peafowl have focused on classifying and  
409 describing various types of parasites. Our study goes one step further in exploring association

410 of intestinal parasites in Indian peafowls with group size dynamics, seasonal changes as well  
411 as anthropogenic factors such as food provisioning. Thus, the study furthers our  
412 understanding of factors that shape the grouping behaviour of a mostly ground dwelling bird  
413 species in the context of ecological stressors such as parasite transmission and predation.

414

## 415 **References**

416 Atkinson CT, Thomas NJ, Hunter DB (2008) *Parasitic Diseases of Wild Birds*. Wiley-  
417 Blackwell, U.S.A

418 Aureli F, Schaffner CM, Boesch C, Bearder SK, Call J, Chapman CA, Connor R, Fiore A,  
419 Dunbar RIM (2008) Fission-Fusion Dynamics. *Curr Anthropol* 49:627–654. doi:  
420 10.1086/586708

421 Bhatt S, Khajuria JK, Katoch R, Dhama K (2014) Prevalence of endoparasites in Backyard  
422 poultry in North Indian Region: A Performance Based Assessment Study. *Asian J Anim Vet*  
423 *Adv* 9:479-488. doi: 10.3923/ajava.2014.479.488

424 Beauchamp G (2010) Relationship between distance to cover, vigilance and group size in  
425 staging flocks of Semipalmated sandpipers. *J Ethol* 116:645-652. doi: 10.1111/j.1439-  
426 0310.2010.01778.x

427

428 Burton M, Burton R (2002) *International Wildlife Encyclopedia*. Marshall Cavendish, New  
429 York.

430

- 431 Caillaud D, Levrero F, Cristescu R, Gatti S, Dewas M, Douadi M, Gautier-Hion A, Raymond  
432 M, Meynard N (2006) Gorilla susceptibility to Ebola virus: The cost of sociality. *Curr Biol*  
433 *Magazine R* 489. doi :[10.1016/j.cub.2006.06.017](https://doi.org/10.1016/j.cub.2006.06.017)  
434
- 435 Clark CW, Mangel M (1986) The Evolutionary Advantages of Group Foraging. *Theor Popul*  
436 *Biol* 30: 45-47. doi: [10.1016/0040-5809\(86\)90024-9](https://doi.org/10.1016/0040-5809(86)90024-9)  
437
- 438 Clutton-Brock TH, Parker GA (1995) Sexual coercion in animal societies. *Anim Behav* 49:  
439 1345-1365. doi: [10.1006/anbe.1995.0166](https://doi.org/10.1006/anbe.1995.0166).  
440
- 441 Couzin ID (2006) Behavioral ecology: social organization in fission–fusion societies. *Curr*  
442 *Biol* R169-R171. doi:[10.1016/j.cub.2006.02.042](https://doi.org/10.1016/j.cub.2006.02.042)  
443
- 444 Cresswell W (1994) Flocking is an effective anti-predation strategy in redshanks, *Tringa*  
445 *totanus*. *Anim Behav* 47: 433-442. doi: [10.1006/anbe.1994.1057](https://doi.org/10.1006/anbe.1994.1057)  
446
- 447 Croft DP, Krause J, James R (2004) Social networks in the guppy (*Poecilia reticulata*). *Proc*  
448 *R Soc B* 271: 516-519. doi: [10.1098/rsbl.2004.0206](https://doi.org/10.1098/rsbl.2004.0206)  
449
- 450 Cross PC, Edwards WH, Scurlock BM, Maichak EJ, Rogerson JD (2007) Effects of  
451 management and climate on elk brucellosis in the Greater Yellowstone Ecosystem. *Ecol*  
452 *Appl* 17:957–964. doi:[10.1890/06-1603](https://doi.org/10.1890/06-1603)  
453
- 454 Duszyński D, Wilber PG (1997) A Guideline for the Preparation of Species Descriptions in  
455 the Eimeriidae. *J Parasitol* 83: 333-336. doi: [10.2307/3284470](https://doi.org/10.2307/3284470)

456

457 FishlockV, Lee PC (2013) Forest elephants: fission–fusion and social arenas. *Anim*  
458 *Behav* 85: 357–363. doi: [10.1016/j.anbehav.2012.11.004](https://doi.org/10.1016/j.anbehav.2012.11.004)

459

460 Fleischer RC (1983) Relationships between tidal oscillations and Ruddy Turnstone flocking,  
461 foraging and vigilance behaviour. *Condor* 85: 22–29. doi: [10.2307/1367881](https://doi.org/10.2307/1367881)

462

463 Foster WA, Treherne JE (1981) Evidence for the dilution effect in the selfish herd from fish  
464 predation on a marine insect. *Nature* 293: 466-467. doi: [10.1038/293466a0](https://doi.org/10.1038/293466a0)

465

466 Freeland WJ (1979) Primate social groups as biological islands. *Ecology* 60: 719-728.  
467 doi: [10.2307/1936609](https://doi.org/10.2307/1936609)

468

469 Gompper ME, Wright, AN (2005) Altered prevalence of raccoon roundworm (*Baylisascaris*  
470 *procyonis*) owing to manipulated contact rates of hosts. *J Zool* 266: 215–219.  
471 doi: [10.1017/S0952836905006813](https://doi.org/10.1017/S0952836905006813)

472

473 Gunn A, Pitt SJ (2012) *Parasitology An Integrated Approach*. Wiley-Blackwell, UK

474

475 Hochberg M (1991) Viruses as costs to gregarious feeding behaviour in the Lepidoptera.  
476 *Oikos* 61: 291-296. doi: [10.2307/3545236](https://doi.org/10.2307/3545236)

477

478 Inger R, Bearhop S, Robinson JA, Ruxton G (2006) Prey choice affects the trade-off balance  
479 between predation and starvation in an avian herbivore. *Anim Behav* 71:1335–1341. doi:  
480 [10.1016/j.anbehav.2005.08.015](https://doi.org/10.1016/j.anbehav.2005.08.015)

481

482 Jaiswal AK, Sudan V, Shanker, D, Kumar P (2013) Endoparasitic infections in Indian  
483 peacocks (*Pavo cristatus*) of Veterinary College Campus, Mathura. J Parasit Disease 37: 26–  
484 28. doi: 10.1007/s12639-012-0124-1

485

486 Jessop TS, Smissen P, Scheelings F, Dempster T (2012) Demographic and Phenotypic  
487 Effects of Human Mediated Trophic Subsidy on a Large Australian Lizard (*Varanus varius*):  
488 Meal Ticket or Last Supper? PLoS One 7:1-8. doi:10.1371/journal.pone.0034069

489

490 Kashima K, Ohtsuki H, Satake A (2013) Fission-fusion bat behaviour as a strategy for  
491 balancing the conflicting needs of maximizing information accuracy and minimizing  
492 infection risk. J Theor Biol 318:101–109. doi: 10.1016/j.jtbi.2012.10.034

493

494 Knapp CR, Hines KN, Zachariah TT, Perez-Heydrich C, Iverson JB, Buckner SD, Halach  
495 SC, Lattin CR, Romero ML (2013) Physiological effects of tourism and associated food  
496 provisioning in an endangered iguana. Conserv Physiol 1:1-12. doi: [10.1093/conphys/cot032](https://doi.org/10.1093/conphys/cot032)

497

498 Krause J, Ruxton GD (2002) Living in Groups. New York: Oxford University Press.

499

500 Lehmann J, Boesch C (2004) To fission or to fusion: effects of community size on wild  
501 chimpanzee (*Pan troglodytes verus*) social organisation. Behav Ecol Sociobiol 56: 207-216.  
502 doi : 10.1007/s00265-004-0781

503

504 Leung TLF, Koprivnikar J (2016) Nematode parasite diversity in birds: the role of host  
505 ecology, life history and migration. J Anim Ecol 85: 1471-1480. doi: 10.1111/1365-  
506 2656.12581

507

508 Lutz HL ,Hochachka WM, Engel JI, Bell JA, Tkach VV, Bates JM, Hackett JS, Weckstein

509 JD (2015) Parasite prevalence corresponds to host life history in a diverse assemblage of

510 Afrotropical birds and Haemosporidian parasites. PLoS ONE 10: 1-24.

511 doi:10.1371/journal.pone.0121254

512

513 Nandini S, Keerthipriya P, Vidya TNC (2017) Seasonal variation in female Asian elephant

514 social structure in Nagarhole-Bandipur, southern India. Anim Behav 134: 135-145. doi:

515 [10.1016/j.anbehav.2017.10.012](https://doi.org/10.1016/j.anbehav.2017.10.012)

516

517 Pandey VS, Ndao M, Kumar V (1994) Seasonal prevalence of gastrointestinal nematodes in

518 communal land goats of from the highveld of Zimbabwe. Vet Parasitol 51: 241-248. doi :

519 [10.1016/0304-4017\(94\)90161-9](https://doi.org/10.1016/0304-4017(94)90161-9)

520

521 Paranjpe DA, Dange PM (2020) A tale of two species: human and peafowl interactions in

522 human dominated landscape influence each other's behaviour: Wild life near human

523 habitation. Curr Sci 119: 670-679. [10.18520/cs/v119/i4/670-679](https://doi.org/10.18520/cs/v119/i4/670-679)

524

525 Popa-Lisseanu AG, Bontadina F, Mora O, IbÁñez C (2008) Highly structured fission–fusion

526 societies in an aerial-hawking, carnivorous bat. Anim Behav 75: 471-482. doi:

527 [10.1016/j.anbehav.2007.05.011](https://doi.org/10.1016/j.anbehav.2007.05.011)

528

529 Powell G (1974) Experimental analysis of the social value of flocking by starlings (*Sturnus*

530 *vulgaris*) in relation to predation and foraging. Anim Behav 22: 501-505. doi :

531 [10.1016/S0003-3472\(74\)80049-7](https://doi.org/10.1016/S0003-3472(74)80049-7)



532

533 Pulliam HR (1973) On the advantages of Flocking. *J Theor Biol* 38: 419-422. doi :

534 [10.1016/0022-5193\(73\)90184-7](https://doi.org/10.1016/0022-5193(73)90184-7)

535

536 Rand MRW, Ridley MW, Lelliot AD (1984) The social organization of feral Indian peafowl.

537 *Anim Behav* 32: 830-835. doi : [10.1016/S0003-3472\(84\)80159-1](https://doi.org/10.1016/S0003-3472(84)80159-1)

538

539 Rimbach R, Bisanzio D, Galvis N, Link A, Di Fore A, Gillespie TR (2015) Brown spider

540 monkeys (*Ateles hybridus*): a model for differentiating the role of social networks and

541 physical contact on parasite transmission dynamics. *Phil Trans R Soc B* 370: 1-10. doi :

542 [10.1098/rstb.2014.0110](https://doi.org/10.1098/rstb.2014.0110)

543

544 Robb GN, McDonald RA, Chamberlain DE, Bearhop S (2008) Food for thought:

545 supplementary feeding as a driver of ecological change in avian populations. *Front Ecol*

546 *Environ* 6: 476–484. doi : [10.1890/060152](https://doi.org/10.1890/060152)

547 Sah P, Mann J, Bansal S (2017) Disease implications of animal social network structure: A

548 synthesis across social systems. *J Anim Ecol* 87: 546-558. doi : [10.1111/1365-2656](https://doi.org/10.1111/1365-2656)

549 Schoener ER, Howe L, Castro I, Alley MR (2012) Helminths in endemic, native and

550 introduced passerines in New Zealand. *N Z J Zool* 39: 245-256. doi:

551 [10.1080/03014223.2012.676992](https://doi.org/10.1080/03014223.2012.676992)

552 Silk JB (2007) The adaptive value of sociality in mammalian groups. *Phil Trans Biol Sci* 362:

553 539-559. doi : [10.1098/rstb.2006.1994](https://doi.org/10.1098/rstb.2006.1994)

554 Silk MJ, Croft DP, Trgenza T, Bearhop S (2014) The importance of fission–fusion social

555 group dynamics in birds. *Ibis* 156: 701–715. doi : [10.1111/ibi.12191](https://doi.org/10.1111/ibi.12191)

556 Smith H, Frère C, Kobryn H, Bejder L (2016) Dolphin sociality, distribution and calving as  
557 important behavioural patterns informing management. *Anim Conserv* 19: 462-471.  
558 doi:10.1111/acv.12263

559 Snore DA (1939) Differentiation of eggs of various genera of Nematodes parasitic in  
560 domestic ruminants in the United States. USDA, Washington, D.C. U.S.A

561 Sutton N (2019) Effects of food limitation on social grouping and foraging in a fission-fusion  
562 species. Dissertation, University of Canterbury. vanSchaik CP (1999) The socioecology of  
563 fission-fusion sociality in Orangutans.

564 *Primates* 40: 69–86. doi: 10.1007/BF02557703

565

566 Watve MG, Sukumar R (1992) Parasite abundance and diversity in mammals: Correlates  
567 with host ecology. *Proc Natl Acad Sci U.S.A.* 92: 8945-8949. doi: [10.1073/pnas.92.19.8945](https://doi.org/10.1073/pnas.92.19.8945)

568

569 Wittemeyer G, Douglas-Hamilton I, Getz WM (2005) The socioecology of elephants:  
570 analysis of the processes creating multitiered social structures. *Anim Behav* 69: 1357–1371.

571 [doi: 10.1016/j.anbehav.2004.08.018](https://doi.org/10.1016/j.anbehav.2004.08.018)

572

573

574

575

576

577

578

579

580

581

### Figure captions

582 Fig 1 Conceptual framework of the study. This study explores the links between intestinal  
583 parasite infections and group size dynamics in Indian peafowl populations. Seasons (Pre-  
584 Monsoon, Monsoon, Post-Monsoon) may directly influence group size and intestinal parasite  
585 infections. We checked whether parasite prevalence and load is influenced by food  
586 provisioning. We speculate that food provisioning may indirectly influence group size  
587 dynamics of Indian peafowl

588 Fig 2 Representative photos of parasite types identified from faecal samples of Indian  
589 peafowl (a) shows sporulated Eimerideae and (b) shows non-sporulated Eimerideae, (c), (d),  
590 (e) and (f) represent Trematode, Nematode, Helminth and Cestode, respectively. Scale bars in  
591 all panels represent 1 $\mu$  size

592 Fig 3 Frequency Distribution depicting Group size of Indian peafowl across Monsoon (Max.  
593 group size=8, Median= 1), Post-Monsoon (Max. group size=9, Median= 1) and Pre-Monsoon  
594 (Max. group size=14, Median=1) seasons

595 Fig 4 Frequency Distribution depicting Parasite load (Counts/microscopic fields) of Indian  
596 peafowl across Monsoon (Max. count= 16, Median=1.05), Post-Monsoon (Max. count=  
597 24.62, Median=1.5) and Pre-Monsoon (Max. count= 25.54, Median=0.125) seasons

598 Fig 5 Frequency Distribution depicting Parasite load (Counts/microscopic fields) at provision  
599 (Max. count=25.54, Median=1.11) and non-provision sites (Max. count=16, Median=0.45)

600 Fig 6 Percentage prevalence for Parasite types-Eimerideae, Nematode, Cestode, Helminth  
601 and Trematode across Monsoon, Post-Monsoon and Pre-Monsoon seasons

602 Fig 7 Percentage prevalence for Parasite types-Eimerideae, Nematode, Cestode, Helminth  
603 and Trematode at non-provision and provision sites

604 Fig 8 Percentage prevalence for Parasite types-Eimerideae, Nematode, Cestode, Helminth  
605 and Trematode across Morachi Chincholi, Nashik and Rajasthan

606

607

608

609

610

611

612

**Fig.1.**

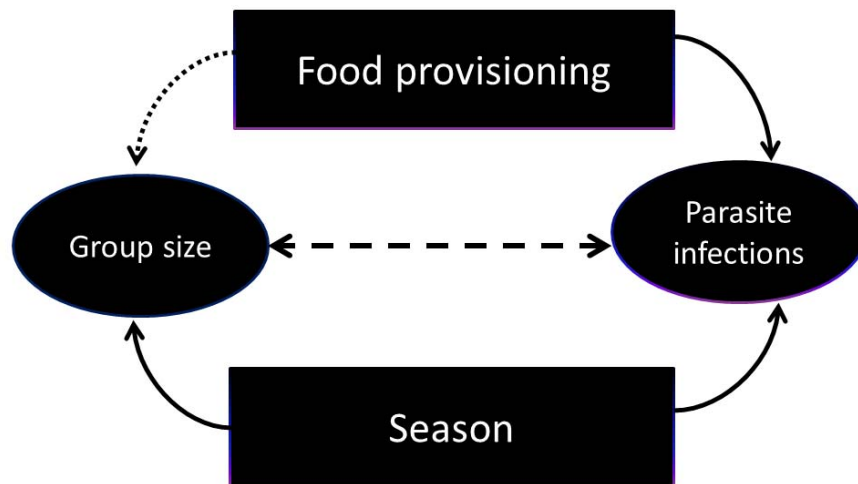

613

614

615

616

617

618

619

620

621

622

623

624

625

626

**Fig.2.**

627

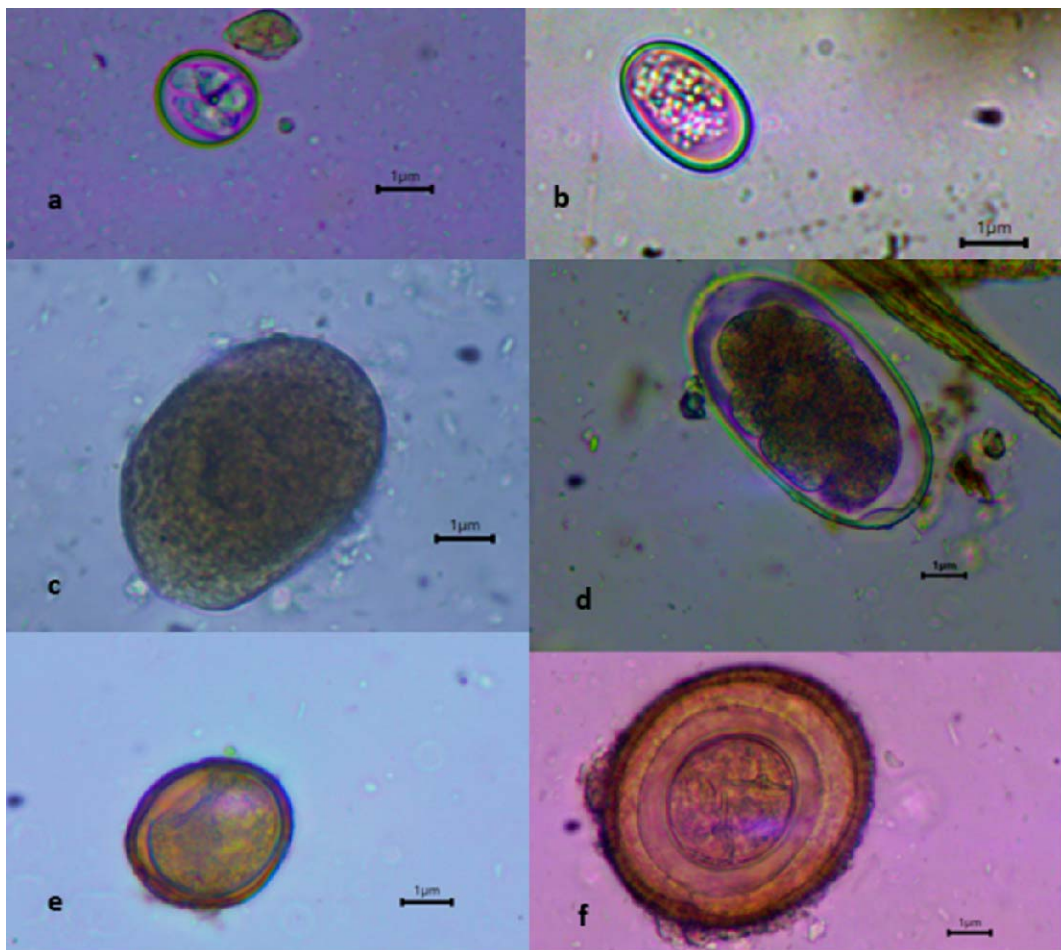

628

629

630

631

632

633

634

635

636

637

638

639

**Fig. 3.**

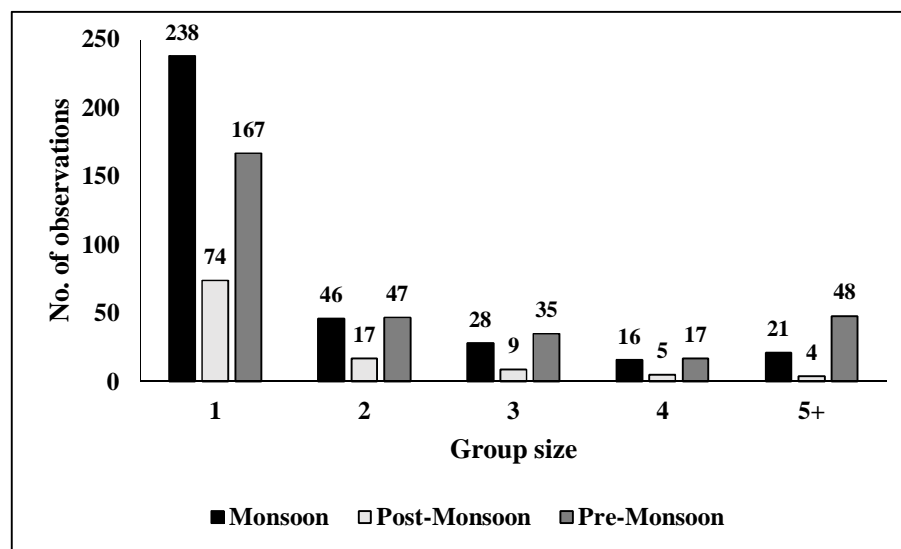

640

641

642

643

644

645

646

647

648

649

650

651

Fig. 4.

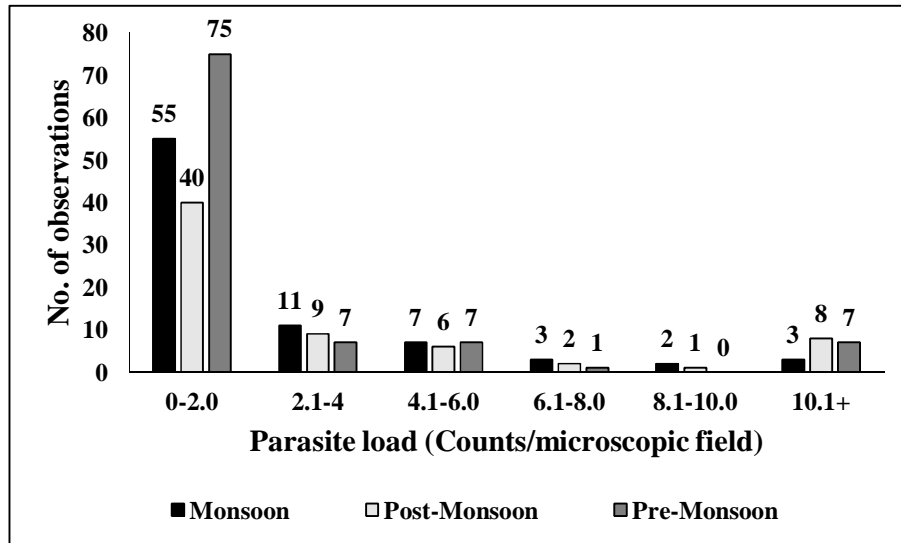

652

653

654

655

Fig. 5.

656

657

658

659

660

661

662

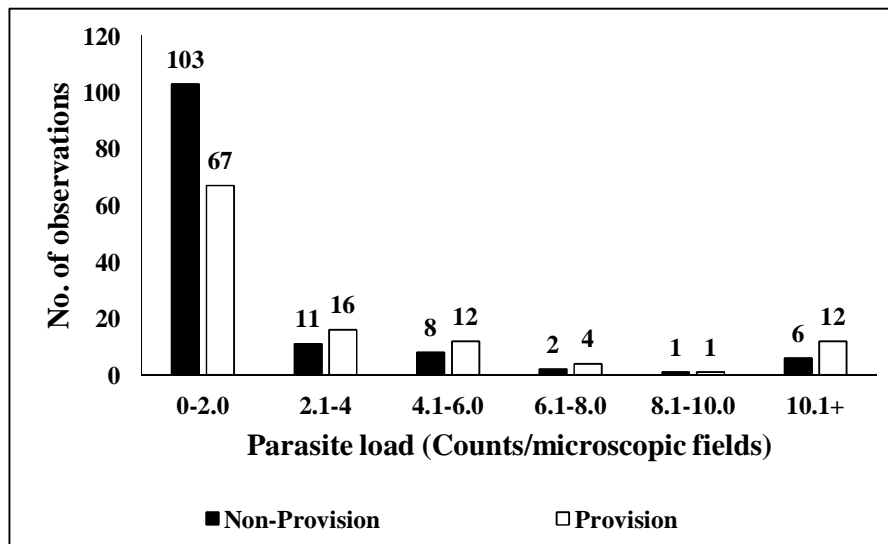

663

664

665

666

667

Fig.6.

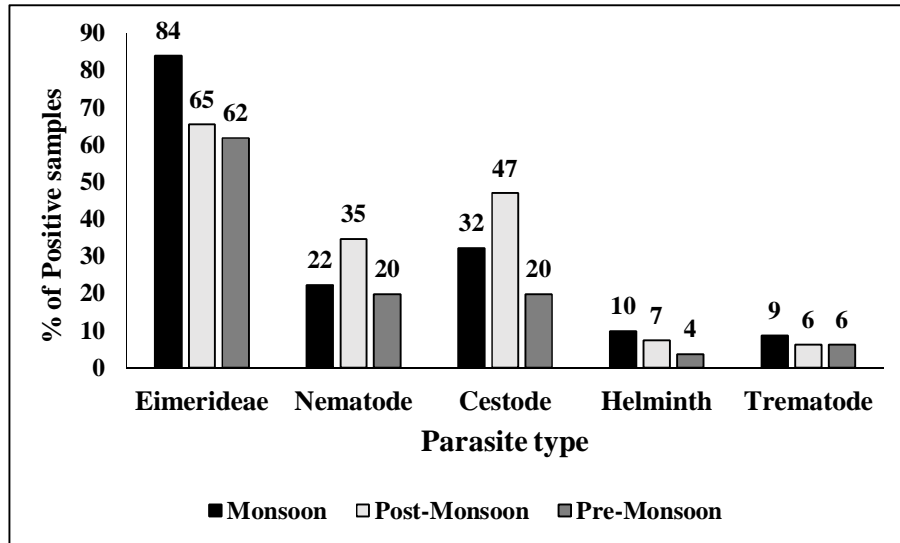

668

669

670

671

672

Fig.7.

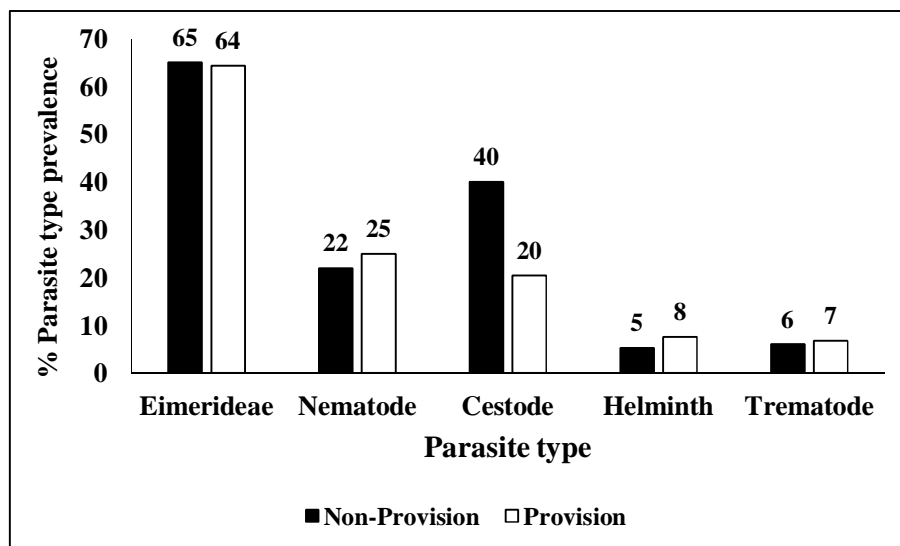

673

674

675

676

677

678

679



680

681

682

683

684

**Fig. 8.**

685

686

687

688

689

690

691

692

693

694

695

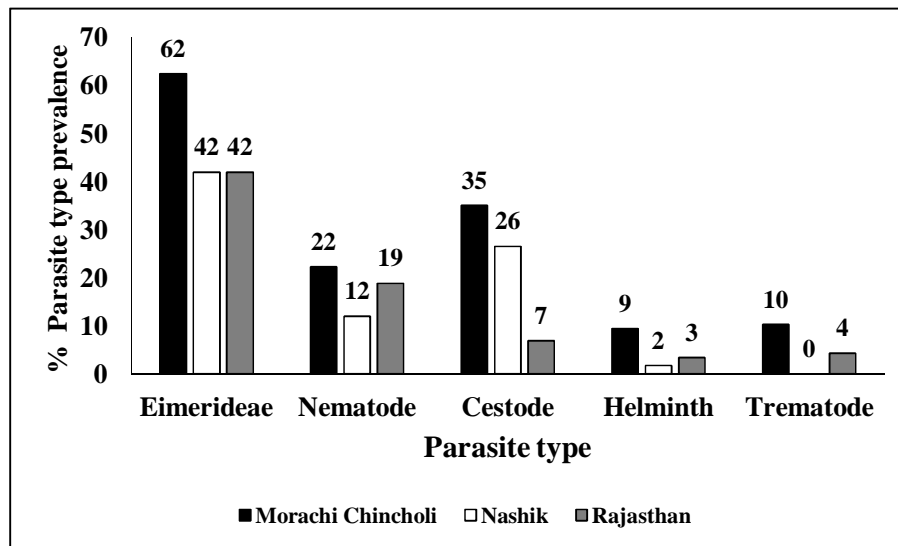

Source: https://www.biorxiv.org/content/10.1101/2020.01.03.893503v2.full.pdf
